# Supplementary material for: Geminal dehydrogenation of a C(sp3) CH2 group by unsaturated Ru(II) or Os(II)
Source: Royal Society of Chemistry journal article supplement (doi:10.1039/b007200l), 2000-01-01
Supplement: b007200l.doc [file b007200l.doc]

Supplementary material for:

**Geminal Dehydrogenation of a C(sp3) CH2 Group by Unsaturated Ru(II) or Os(II)**

# Joseph N. Coalter, III, German Ferrando and Kenneth G. Caulton*

**Experimental**

**General considerations.** All manipulations were performed using standard Schlenk techniques or in an argon filled glovebox unless otherwise noted. Solvents were distilled from Na, Na/benzophenone, P2O5, or CaH2, degassed prior to use, and stored over 4 Å molecular sieves in air-tight vessels. [RuHCl(PiPr3)2]2[[1]](#endnote-2), was prepared as previously reportedand all other reagents were used as received from commercial vendors after drying and degassing when necessary. *In situ* NMR identification of RuHCl(PiPr3)2(=C(CH2)3O)[[2]](#endnote-3), and RuH(H2)Cl(PiPr3)2[[3]](#endnote-4),[[4]](#endnote-5), were made by comparison to literature data and/or authentic samples. 1H NMR chemical shifts are reported in ppm relative to protio impurities in the deutero solvents. 31P NMR spectra are referenced to an external standard of 85% H3PO4 (0 ppm). NMR spectra were recorded with either a Varian Gemini 2000 (300 MHz 1H; 121 MHz 31P; 75 MHz 13C), or a Varian Unity Inova instrument (400 MHz 1H; 162 MHz 31P; 101 MHz 13C).

**Thermolysis of [RuHCl(PiPr3)2]2 in THF.** 15.0 mg (0.016 mmol) of [RuHCl(PiPr3)2]2 was dissolved in 0.5 mL of THF and added to an NMR tube equipped with a Teflon closure. The sample was heated for 3 h at 80 ºC and the volatiles were removed *in vacuo*. 1H and 31P NMR measurements taken upon re-dissolving the residue in C6D6 showed complete consumption of starting material and >90% conversion to equimolar RuHCl(PiPr3)2(=C(CH2)3O) andRuH(H2)Cl(PiPr3)2.

**[RuHCl(PiPr3)2]2 in THF at room temperature.** 15.0 mg (0.016 mmol) of [RuHCl(PiPr3)2]2 was dissolved in 0.5 mL of THF and added to an NMR tube equipped with a Teflon closure. The sample was stored in a glovebox and monitored periodically by 31P NMR. After 2 weeks, there was >85% conversion to equimolar RuHCl(PiPr3)2(=C(CH2)3O) andRuH(H2)Cl(PiPr3)2, with the balance of material as unreacted [RuHCl(PiPr3)2]2.

**RuH(H2)Cl(PiPr3)2 plus CH2=CHtBu.** 15.0 mg (0.033 mmol) of RuH(H2)Cl(PiPr3)2 and 4.2 L (0.033 mmol) of 3,3‑dimethyl‑1‑butene were combined in 0.5 mL of C6D6 and added to an NMR tube. 1H and 31P NMR measurements taken after 1 h show quantitative formation of [RuHCl(PiPr3)2]2 and 2,2‑dimethylbutane.

**[RuHCl(PiPr3)2]2 plus CH2=CHtBu in THF at room temperature.** 15.0 mg (0.016 mmol) of [RuHCl(PiPr3)2]2 was dissolved in 0.5 mL of THF and added to an NMR tube equipped with a Teflon closure. Via syringe, 21.1 L (0.163 mmol) of 3,3‑dimethyl‑1‑butene were added and the tube sealed. 31P NMR measurements taken periodically showed <5% formation of RuHCl(PiPr3)2(=C(CH2)3O), complete consumption of starting [RuHCl(PiPr3)2]2, and more than 4 AB or AX patterns after 48 h at room temperature.

**Reaction of OsH3Cl(PiPr3)2 with t-butylethylene in benzene.** In an NMR tube, the complex OsH3Cl(PiPr3)2 (0.010g, 0.018 mmol) was dissolved in 0.8 ml of benzene-d6 and t-butylethylene (4.7 µl, 0.036 mmol) was added to the solution. The reaction was followed by 1H and 31P {1H} NMR. After 4.5 h at room temperature the solution is a mixture of products by 31P{1H} NMR (10% OsH2Cl2L2, 3% OsH5ClL2, 10% free PiPr3). The main product (50% yield) by 31P {1H} NMR is OsHCl(2-H2C=CHtBu)(PiPr3)2. Upon vacuum removal of the volatiles the major product decomposes. Only diagnostic data are provided. 1H NMR (300 MHz, C6D6, 20 oC):  –41.1 (t, J(H-P) = 24 Hz, Os-H), 4.77 (d, J(H-H) = 11 Hz, Os(2-*H*2C= CHtBu). 31P {1H} NMR (121.4 MHz, C6D6, 20 oC ): 5.9, 2.4 (A and B of an AB pattern, J(P-P’) = 312 Hz).

**Reaction of OsH3Cl(PiPr3)2 with t-butylethylene in THF.** In an NMR tube, OsH3Cl(PiPr3)2 (0.010g, 0.018 mmol) was dissolved in 0.8 ml of THF and t-butylethylene (4.7 µl, 0.036 mmol) was added to the solution. The reaction was followed by 31P {1H} NMR. After 4.5 h at room temperature the solution is a mixture of products by 31P {1H} NMR [5% OsH2Cl2L2, 3% OsH5ClL2, 8% free PiPr3, 30% OsHCl(2-H2C=CHtBu)L2]. The main product (55% yield) by 31P {1H} NMR is the cyclic carbene OsHCl[=C(CH2)3O](PiPr3)2. Upon vacuum removal of the volatiles, the brown residue is redissolved in benzene-d6. Only diagnostic data are provided. 1H NMR (300 MHz, C6D6, 20 oC):  –21.90 (t, J(H-P) = 17.4 Hz, Os-*H* ), 1.41 (dvt, J(H-H) = 7.2 Hz, N = 12.8 Hz, Os-P[CH(C*H*3)2]), 1.44 (dvt, J(H-H) = 7.2 Hz, N = 12.8 Hz, Os-P(CH(C*H*3)2]), 1.46 (m, Os[=C(CH2-C*H*2-CH2-O)]), 1.99 (t, J(H-H) = 7.5 Hz, Os[=C(C*H*2-CH2-CH2-O)]), 2.53 (m, Os-P[C*H*(CH3)2]), 3.46 (t, J(H-H) = 7.5 Hz, Os[=C(CH2-CH2-C*H*2-O)]). 31P {1H} NMR (121.4 MHz, C6D6, 20 oC): 44.9 (central 2 lines of an AB pattern).

# References

1. . [RuHCl(PiPr3)2]2 was prepared by dropwise addition (over 2 h) of a toluene solution of lithium tetramethylpiperidide to a stirred suspension of RuH2Cl2(PiPr3)2 in toluene. After a pentane extraction, the dark red residue was washed with cold (–78 C) ethyl acetate. See also reference 2. [↑](#endnote-ref-2)
2. . Coalter, J. N., III; Bollinger, J. C.; Huffman, J. C.; Werner-Zwanziger, U.; Caulton, K, G.; Davidson, E. R.; Gérard, H.; Clot, E.; Eisenstein, O. *New J. Chem*. **2000**, *24*, 9. [↑](#endnote-ref-3)
3. . Burrow, T.; Sabo-Etienne, S.; Chaudret, B. *Inorg. Chem*. **1995**, *34,* 2470. [↑](#endnote-ref-4)
4. . Wolf, J.; Steuer, W.; Gruenwald, C.; Gevert, O.; Laubender, M.; Werner, H. *Eur. J. Inorg. Chem*. **1998**, *11*, 1827. [↑](#endnote-ref-5)
